# Supplementary material
Source: Research Square preprint supplement (doi:10.21203/rs.3.rs-9352638/v1)

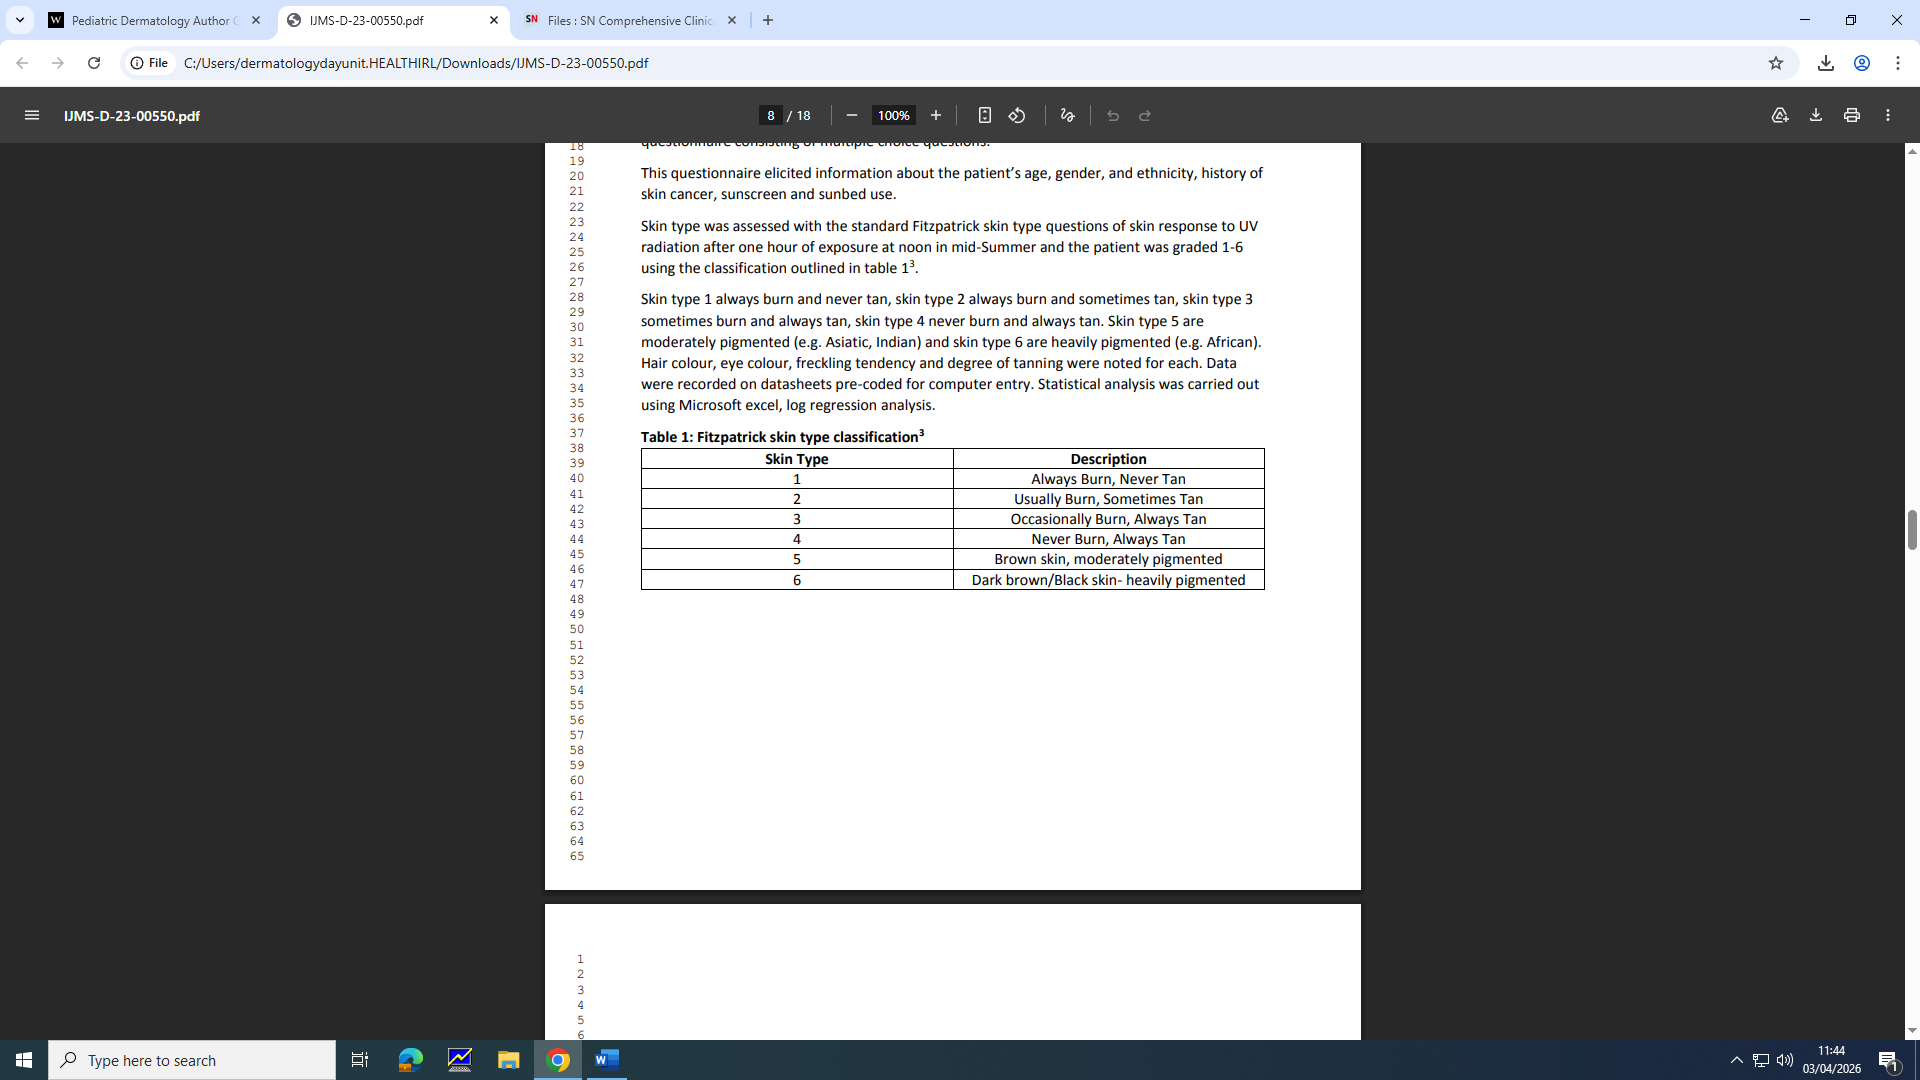


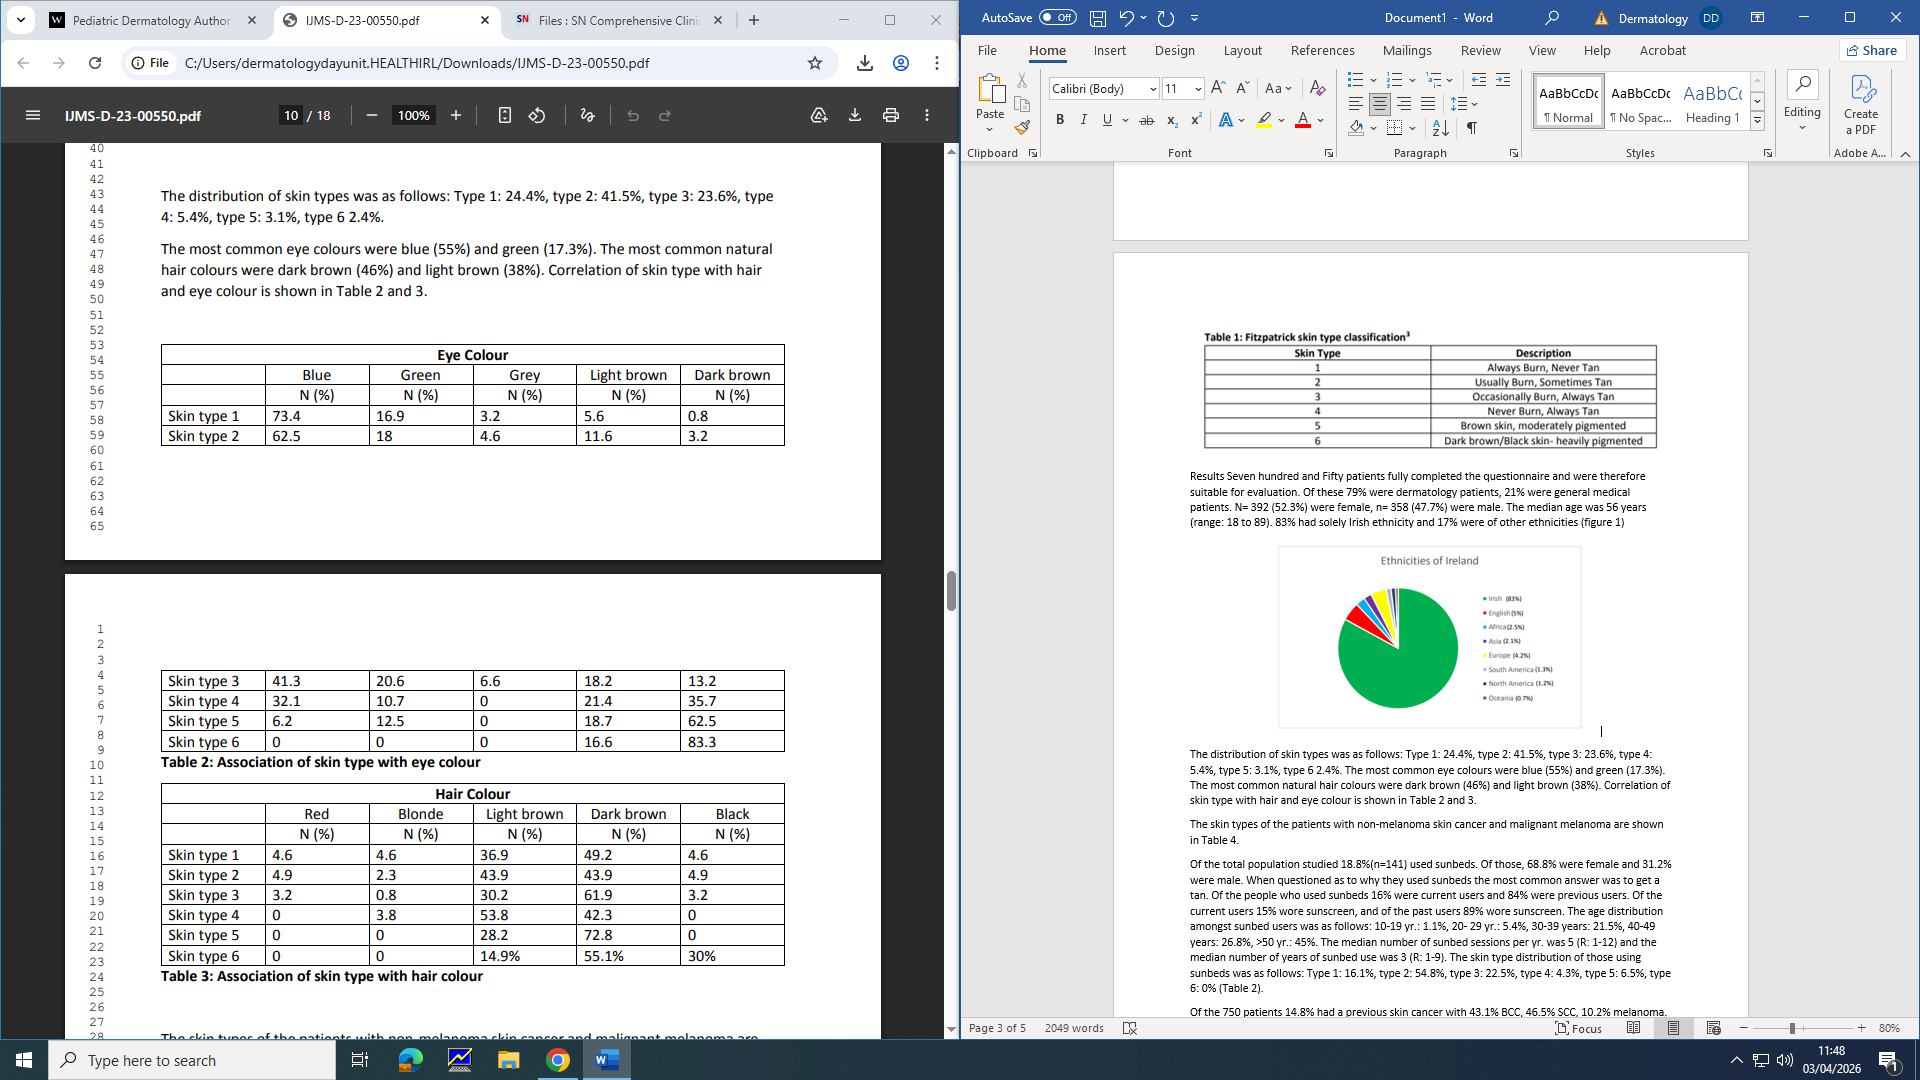


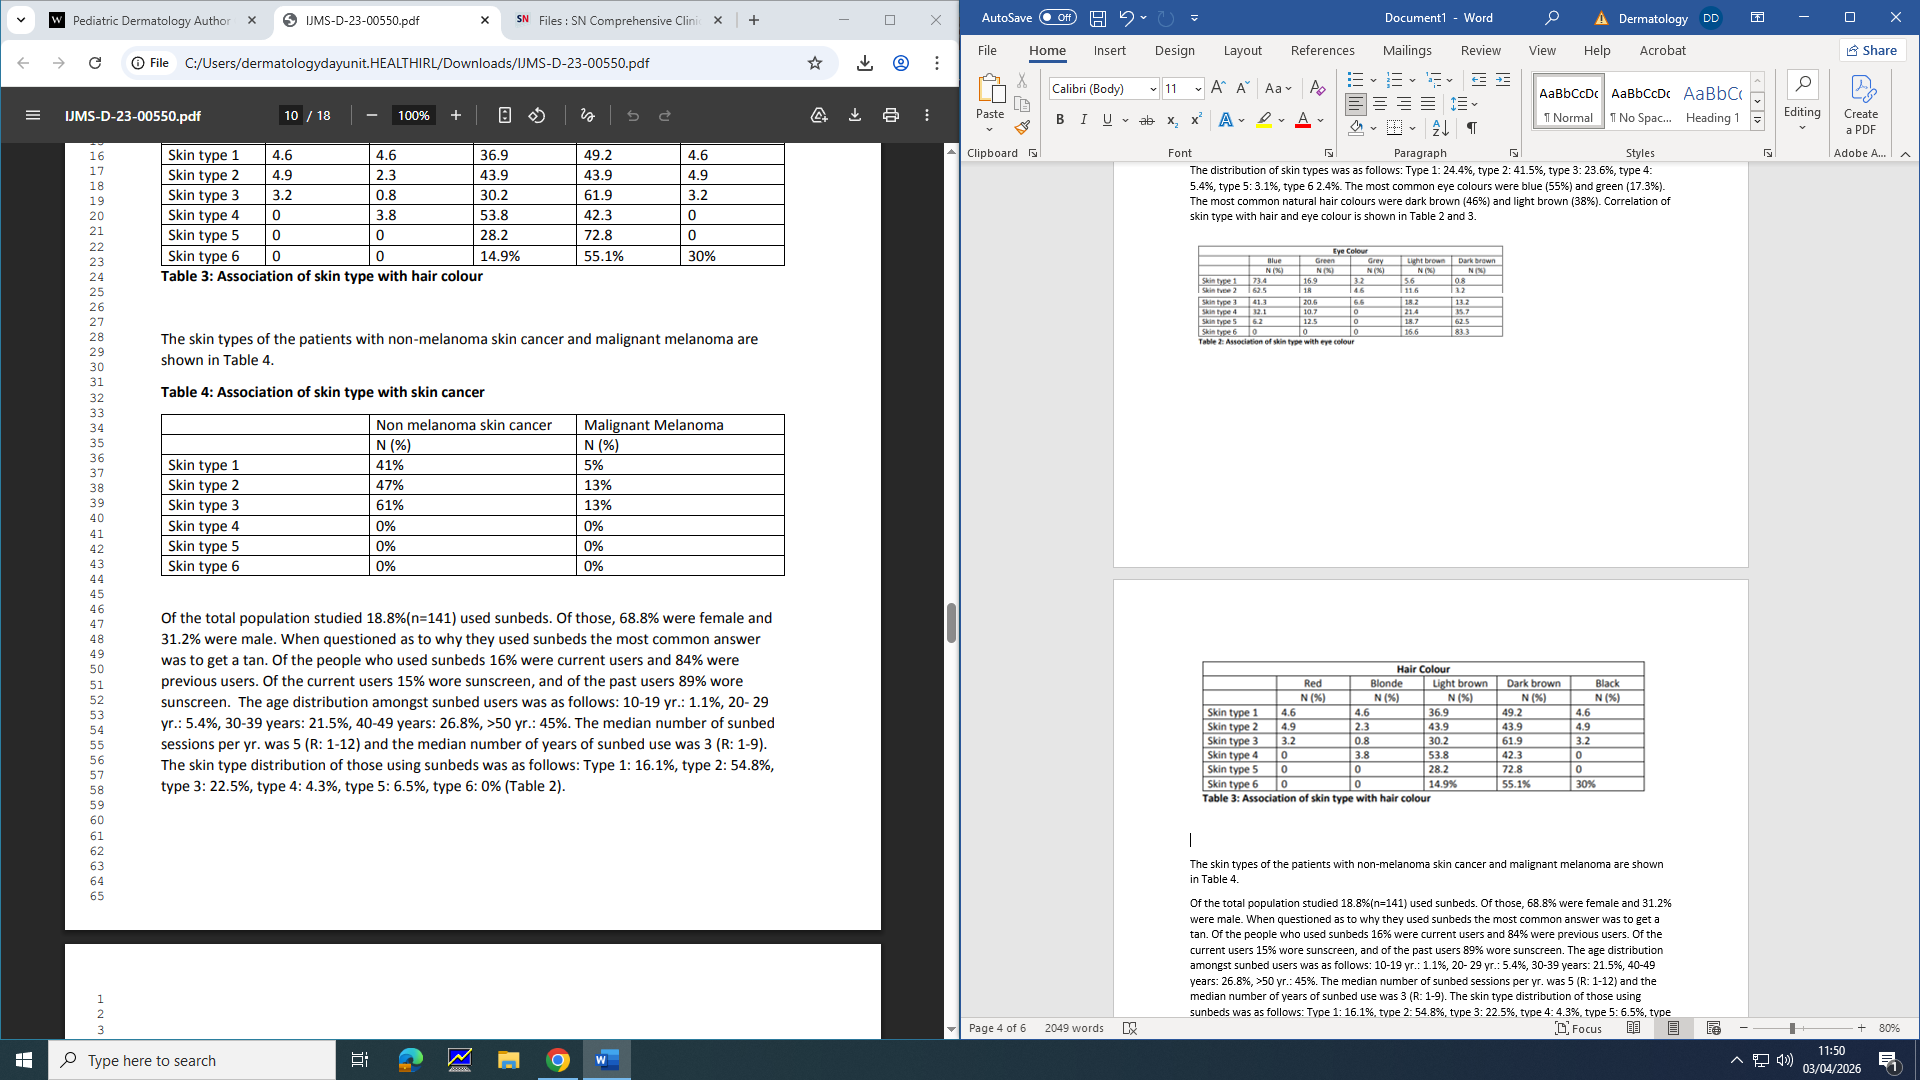

Supplement: Supplementary file 1 [file 2fdda3aa03a1bb478fe484f5.docx]
